# Supplementary material
Source: PubMed Central journal article supplement (PMC10367115)
Supplement: NIHMS1912467-supplement-Supp_Table_2_ST2.pdf [file NIHMS1912467-supplement-Supp_Table_2_ST2.pdf]

## STAR★METHODS

### KEY RESOURCES TABLE

| REAGENT or RESOURCE                                  | SOURCE                                            | IDENTIFIER                                                                                                                                                              |
|------------------------------------------------------|---------------------------------------------------|-------------------------------------------------------------------------------------------------------------------------------------------------------------------------|
| <b>Antibodies</b>                                    |                                                   |                                                                                                                                                                         |
| Anti-Myc tag (Alexa Fluor® 647 Conjugate)            | Cell Signaling Technology                         | Cat# 2233S                                                                                                                                                              |
| Goat polyclonal anti-human IgG                       | Sigma-Aldrich                                     | Cat# I1886-2ML                                                                                                                                                          |
| CD4 Pacific Blue                                     | BioLegend                                         | Cat# 300521; RRID: AB_493098                                                                                                                                            |
| CD45RA APCCy7                                        | BioLegend                                         | Cat# 304128; RRID: AB_10708880                                                                                                                                          |
| CD45RO BV570                                         | BioLegend                                         | Cat# 304226; RRID: AB_2563818                                                                                                                                           |
| CD62L BV605                                          | BD Biosciences                                    | Cat# 562719; RRID: AB_2744441                                                                                                                                           |
| CD95 PE                                              | BioLegend                                         | Cat# 305608; RRID: AB_314546                                                                                                                                            |
| CD8 BV786                                            | BD Biosciences                                    | Cat# 563823; RRID: AB_2687487                                                                                                                                           |
| anti-Myc-Tag (9B11) Mouse mAb HRP Conjugate          | Cell Signaling Technology                         | Cat# 2040S                                                                                                                                                              |
| anti-CD95 Clone DX2 164Dy                            | Fluidigm                                          | Cat# 3164008B                                                                                                                                                           |
| anti-CTLA-4 Clone 14D8 170Er                         | Fluidigm                                          | Cat# 3170005B; RRID: AB_2858238                                                                                                                                         |
| anti-CD62L Clone DREG56 153Eu                        | Fluidigm                                          | Cat# 3153004B; RRID: AB_2858235                                                                                                                                         |
| anti-PD-1 Clone EH12.2H7 155Gd                       | Fluidigm                                          | Cat# 3155009B; RRID: AB_2811087                                                                                                                                         |
| anti-CD45RO Clone UCHL1 165Ho                        | Fluidigm                                          | Cat# 3165011B; RRID: AB_2756423                                                                                                                                         |
| anti-CD244 polyclonal 142Nd                          | Novus Biologicals                                 | Cat# AF1039                                                                                                                                                             |
| anti-CD4 Clone RPAT4 145Nd                           | Fluidigm                                          | Cat# 3145001B                                                                                                                                                           |
| anti-CD8 Clone RPAT8 146Nd                           | Fluidigm                                          | Cat# 3146001B                                                                                                                                                           |
| anti-EOMES clone 644730 148Nd                        | Novus Biologicals                                 | Cat# MAB6166                                                                                                                                                            |
| anti-Lag-3 Clone 11C3C65 150Nd                       | Fluidigm                                          | Cat# 3150030B                                                                                                                                                           |
| anti-CD3 Clone UCHT1 170Er                           | Fluidigm                                          | Cat# 3170001B; RRID: AB_2811085                                                                                                                                         |
| anti-TIGIT Clone MBSA43 154Sm                        | Fluidigm                                          | Cat# 3154016B; RRID: AB_2888926                                                                                                                                         |
| anti-CCR7 Clone G043H7 159Tb                         | Fluidigm                                          | Cat# 3159003A                                                                                                                                                           |
| anti-CD45 Clone HI30 89Y                             | Fluidigm                                          | Cat# 3089003B                                                                                                                                                           |
| anti-Granzyme B Clone GB11 171Yb                     | Fluidigm                                          | Cat# 3171002B                                                                                                                                                           |
| anti-CD57 Clone HCD57 172Yb                          | Fluidigm                                          | Cat# 3172009B; RRID: AB_2888930                                                                                                                                         |
| T-cell receptor mimic (TCRm) monoclonal antibody     | Kim et al. <sup>58</sup>                          | NA                                                                                                                                                                      |
| <b>Biological samples</b>                            |                                                   |                                                                                                                                                                         |
| Primary T cells                                      | University of Pennsylvania Human Immunology Core. | NA                                                                                                                                                                      |
| CD34 <sup>+</sup> Cells                              | Lonza                                             | Product number "Dn39444" for the experiment in <a href="#">Figures 5F–5K</a> , 0 "CB21/0017/35" for the experiment in <a href="#">Figures 5G</a> and <a href="#">5I</a> |
| <b>Chemicals, peptides, and recombinant proteins</b> |                                                   |                                                                                                                                                                         |
| anti-CD3/CD28 dynabeads                              | Invitrogen                                        | Cat# 402.03D                                                                                                                                                            |
| anti-biotin microbeads                               | Miltenyi                                          | Cat# 130-105-637                                                                                                                                                        |
| HER2 beads                                           | Acro Biosystems                                   | Cat# K006                                                                                                                                                               |
| PMA + ionomycin                                      | eBioscience                                       | Cat# 00-4970-93                                                                                                                                                         |
| Live/Dead Aqua                                       | Thermo-Fischer Scientific                         | Cat# L-34966                                                                                                                                                            |
| RPMI 1640                                            | GIBCO                                             | Cat# 72400-047                                                                                                                                                          |
| Foetal bovine serum (FBS)                            | VWR                                               | Cat# S170G                                                                                                                                                              |
| Peptides                                             | This manuscript                                   | Please see <a href="#">Table S2</a>                                                                                                                                     |
| Custom p/HLA multimers                               | Proimmune, Sarasota, FL                           | NA                                                                                                                                                                      |

(Continued on next page)

**Continued**

| REAGENT or RESOURCE                                                                                 | SOURCE                                                                             | IDENTIFIER                          |
|-----------------------------------------------------------------------------------------------------|------------------------------------------------------------------------------------|-------------------------------------|
| <b>Critical commercial assays</b>                                                                   |                                                                                    |                                     |
| Amaxa P3 Primary Cell kit and protocol                                                              | Lonza                                                                              | Cat# V4XP-3012                      |
| <b>Experimental models: Cell lines</b>                                                              |                                                                                    |                                     |
| HEK 293T                                                                                            | ATCC                                                                               | CRL-3216                            |
| Jurkat E6.1                                                                                         | ATCC                                                                               | TIB-152                             |
| CD19 <sup>+</sup> NALM6 human acute lymphoblastic leukemia                                          | ATCC                                                                               | CRL-3273                            |
| Engineered CBG <sup>+</sup> GFP <sup>+</sup> NALM6 human acute lymphoblastic leukemia               | University of Pennsylvania, Dr. Saar Gill                                          | NA                                  |
| Parental human HER2 <sup>+</sup> ovarian cancer cell line SKOV3                                     | ATCC                                                                               | HBT-77                              |
| Engineered CBG <sup>+</sup> GFP <sup>+</sup> human HER2 <sup>+</sup> ovarian cancer cell line SKOV3 | University of Pennsylvania, Dr. Saar Gill                                          | NA                                  |
| Parental HER2 <sup>-</sup> breast cancer cell line MDA-MB-468                                       | ATCC                                                                               | HBT-132                             |
| Engineered CBG <sup>+</sup> GFP <sup>+</sup> HER2 <sup>-</sup> breast cancer cell line MDA-MB-468   | University of Pennsylvania, Dr. Saar Gill                                          | NA                                  |
| CD20 <sup>+</sup> Raji Burkitt's lymphoma                                                           | ATCC                                                                               | CCL-86                              |
| Engineered CBG + GFP <sup>+</sup> Raji Burkitt's lymphoma                                           | University of Pennsylvania, Dr. Saar Gill                                          | NA                                  |
| K562 erythro-megakaryoblastic leukemia cell line                                                    | ATCC                                                                               | CRL-3343                            |
| Engineered CD20 <sup>+</sup> K562 erythro-megakaryoblastic leukemia cell line                       | University of Pennsylvania, Dr. Avery D. Posey, Jr.; Panjwani et al. <sup>54</sup> | NA                                  |
| XL1-Blue Supercompetent Cells                                                                       | Agilent Technologies                                                               | Cat# 200236                         |
| <b>Experimental models: Organisms/strains</b>                                                       |                                                                                    |                                     |
| NOD/scid/IL2rg                                                                                      | University of Pennsylvania Stem Cell and Xenograft Core                            | RRID:IMSR_JAX:005557                |
| SGM3 (NOD.Cg-Prkdcscid Il2rgtm1Wjl Tg(CMV-IL3,CSF2,KITLG)1Eav/MloySzJ                               | The Jackson Laboratory                                                             | RRID:IMSR_JAX:013062                |
| <b>Recombinant DNA</b>                                                                              |                                                                                    |                                     |
| Lentiviral construct pASP4.2                                                                        | This manuscript                                                                    | Please see <a href="#">Table S1</a> |
| Lentiviral construct pASP4.2.1                                                                      | This manuscript                                                                    | Please see <a href="#">Table S1</a> |
| Lentiviral construct pASP5                                                                          | This manuscript                                                                    | Please see <a href="#">Table S1</a> |
| Lentiviral construct pASP7                                                                          | This manuscript                                                                    | Please see <a href="#">Table S1</a> |
| Lentiviral construct pASP8                                                                          | This manuscript                                                                    | Please see <a href="#">Table S1</a> |
| Lentiviral construct pASP9                                                                          | This manuscript                                                                    | Please see <a href="#">Table S1</a> |
| Lentiviral construct pASP18                                                                         | This manuscript                                                                    | Please see <a href="#">Table S1</a> |
| Lentiviral construct pASP26                                                                         | This manuscript                                                                    | Please see <a href="#">Table S1</a> |
| Lentiviral construct pASP28                                                                         | This manuscript                                                                    | Please see <a href="#">Table S1</a> |
| Lentiviral construct pASP30                                                                         | This manuscript                                                                    | Please see <a href="#">Table S1</a> |
| Lentiviral construct pASP36                                                                         | This manuscript                                                                    | Please see <a href="#">Table S1</a> |
| Lentiviral construct pASP38                                                                         | This manuscript                                                                    | Please see <a href="#">Table S1</a> |
| Lentiviral construct pASP52                                                                         | This manuscript                                                                    | Please see <a href="#">Table S1</a> |
| Lentiviral construct pASP59                                                                         | This manuscript                                                                    | Please see <a href="#">Table S1</a> |
| Lentiviral construct pASP72                                                                         | This manuscript                                                                    | Please see <a href="#">Table S1</a> |
| Lentiviral construct pASP73                                                                         | This manuscript                                                                    | Please see <a href="#">Table S1</a> |
| Lentiviral construct pASP75                                                                         | This manuscript                                                                    | Please see <a href="#">Table S1</a> |
| Lentiviral construct pASP85                                                                         | This manuscript                                                                    | Please see <a href="#">Table S1</a> |
| Lentiviral construct pASP89                                                                         | This manuscript                                                                    | Please see <a href="#">Table S1</a> |
| Lentiviral construct pASP90                                                                         | This manuscript                                                                    | Please see <a href="#">Table S1</a> |
| Lentiviral construct pASP96                                                                         | This manuscript                                                                    | Please see <a href="#">Table S1</a> |
| Lentiviral construct pASP97                                                                         | This manuscript                                                                    | Please see <a href="#">Table S1</a> |

(Continued on next page)

---

**Continued**

| REAGENT or RESOURCE          | SOURCE              | IDENTIFIER                                                                                                                                      |
|------------------------------|---------------------|-------------------------------------------------------------------------------------------------------------------------------------------------|
| Lentiviral construct ceGFP   | This manuscript     | Please see Table S1                                                                                                                             |
| Lentiviral construct chIL-12 | This manuscript     | Please see Table S1                                                                                                                             |
| Software and algorithms      |                     |                                                                                                                                                 |
| GraphPad Prism               | GraphPad Software   | <a href="https://www.graphpad.com/">https://www.graphpad.com/</a>                                                                               |
| FlowJo                       | BD                  | <a href="https://www.flowjo.com/">https://www.flowjo.com/</a>                                                                                   |
| Cyt tool (R2016b)            | Columbia University | <a href="https://www.c2b2.columbia.edu/danapeerlab/html/cyt-download.html">https://www.c2b2.columbia.edu/danapeerlab/html/cyt-download.html</a> |
